# Supplementary material
Source: PubMed Central journal article supplement (PMC6322035)
Supplement: AnnalsATS.201802-121OC_geovanini_data_supplement.pdf [file AnnalsATS.201802-121OC_geovanini_data_supplement.pdf]

## Online Data Supplement

### Association between Obstructive Sleep Apnea and Cardiovascular Risk Factors- Variation by Age, Sex and Race: The Multi-Ethnic Study of Atherosclerosis (MESA)

Glaucylara Reis Geovanini MD, PhD;<sup>1</sup> Rui Wang PhD;<sup>1</sup> Jia Weng PhD;<sup>1</sup> Nancy S Jenny PhD, FAHA; <sup>2</sup> Steven Shea MD, MS;<sup>3</sup> Matthew Allison, MD, MPH, FAHA<sup>4</sup>; Peter Libby MD; <sup>5</sup> Susan Redline MD, MPH<sup>1,6</sup>

**Table E1. Descriptive Analysis Showing Characteristics of Participants who Underwent Sleep Studies and the Analytical Sample**

|                                             | Total Sleep study<br>(n=2,057) | Analytical sample<br>(n=1,344) |
|---------------------------------------------|--------------------------------|--------------------------------|
| <b>Age (y)</b>                              | 68 ±9                          | 68±9                           |
| <b>Male sex (%)</b>                         | 46                             | 47                             |
| <b>BMI (kg/m<sup>2</sup>)</b>               | 29 ±5                          | 29 ±5                          |
| <b>Waist circumference (cm)</b>             | 100 ±14                        | 101 ±14                        |
| <b>Education level, (%)</b>                 |                                |                                |
| <High school                                | 15                             | 17                             |
| High school                                 | 16                             | 18                             |
| College or technical                        | 49                             | 49                             |
| Graduate School                             | 20                             | 16                             |
| <b>Race/ethnicity (%)</b>                   |                                |                                |
| White                                       | 36                             | 38                             |
| Chinese                                     | 12                             | 1                              |
| African American                            | 28                             | 29                             |
| Hispanic                                    | 24                             | 32                             |
| <b>Smoking (%)</b>                          |                                |                                |
| Never                                       | 47                             | 41                             |
| Former                                      | 46                             | 51                             |
| Current                                     | 7                              | 8                              |
| <b>Alcohol use (any), (%)</b>               | 43                             | 46                             |
| <b>Statin use, (%)</b>                      | 36                             | 37                             |
| <b>Any antihypertensive medication, (%)</b> | 53                             | 55                             |
| <b>Oral hypoglycemic use, (%)</b>           | 15                             | 16                             |
| <b>eGFR, (ml/min/1.73m<sup>2</sup>)</b>     | 82 ±21                         | 81 ±20                         |
|                                             |                                |                                |

|                                                   |         |         |
|---------------------------------------------------|---------|---------|
| <b>Diabetes Mellitus (%)</b>                      | 20      | 22      |
| <b>Fasting glucose (mg/dL)</b>                    | 102 ±28 | 103 ±31 |
| <b>Hypertension (%)</b>                           | 57      | 59      |
| <b>Systolic BP (mmHg)</b>                         | 123 ±20 | 123 ±20 |
| <b>Diastolic BP (mmHg)</b>                        | 68 ±10  | 68 ±10  |
| <b>Total Cholesterol (mg/dL)</b>                  | 184 ±37 | 182 ±35 |
| <b>HDL-cholesterol (mg/dL)</b>                    | 55 ±16  | 55 ±15  |
| <b>LDL-cholesterol (mg/dL)</b>                    | 107 ±32 | 105 ±30 |
| <b>Triglycerides (mg/dL)</b>                      | 110 ±66 | 110 ±65 |
| <b>Non-HDL cholesterol (mg/dL)</b>                | 128 ±36 | 127 ±35 |
|                                                   |         |         |
| <b>Total sleep time, (min)</b>                    | 360 ±83 | 359 ±81 |
| <b>Time in Slow-wave sleep, (min)</b>             | 37 ±34  | 36 ±34  |
| <b>Time in REM sleep, (min)</b>                   | 66 ±30  | 67 ±30  |
| <b>WASO, (min)</b>                                | 94 ±65  | 91 ±64  |
| <b>Time SpO<sub>2</sub> &lt; 92%, (%)</b>         | 11      | 12      |
| <b>AHI, events/h</b>                              | 14 ±16  | 14 ±16  |
| <b>AHI categories, (%)</b>                        |         |         |
| 0-4                                               | 36      | 35      |
| 5-14                                              | 32      | 33      |
| 15-29                                             | 18      | 17      |
| ≥30                                               | 14      | 14      |
| <b>Arousal index, events/h</b>                    | 22 ±12  | 22 ±12  |
| <b>Epworth Sleepiness Scale score, mean</b>       | 6 ±4    | 6 ±4    |
| <b>Epworth Sleepiness Scale score &gt;10, (%)</b> | 14      | 14      |

Data are shown as mean ±SD for continuous variables and percentages for categorical variables. BMI= body mass index; eGFR= estimated glomerular filtration rate (measurement of kidney function); BP= blood pressure; HDL= high-density lipoprotein; LDL= low-density lipoprotein; Non-HDL cholesterol is calculated by subtracting the HDL cholesterol value from a total cholesterol reading; REM= rapid eye movement sleep stage; WASO= wake after sleep onset; SpO<sub>2</sub>= oxygen saturation; OSA= obstructive sleep apnea; AHI= apnea-hypopnea index; AHI <5= no OSA; AHI 5-14= mild OSA; AHI 15-29= moderate OSA; AHI ≥30= severe OSA; Epworth= daytime excessive sleepiness scale; Epworth >10= daytime excessive sleepiness.

**Table E2. Variation of Values for Leukocyte Counts and Cystatin-C with Apnea Hypopnea Index Category, Unadjusted Analyses**

|                                             | <b>Overall<br/>(n= 1,344)</b> | <b>AHI &lt; 5<br/>(n= 470)</b> | <b>AHI 5-14<br/>(n= 449)</b> | <b>AHI 15-29<br/>(n= 234)</b> | <b>AHI ≥ 30<br/>(n= 191)</b> | <b>P-value</b>   |
|---------------------------------------------|-------------------------------|--------------------------------|------------------------------|-------------------------------|------------------------------|------------------|
| <b>WBC total counts, x10<sup>3</sup>/μL</b> | 5.80<br>(4.80, 6.90)          | 5.50<br>(4.60,7.60)            | 5.80<br>(4.80, 7.00)         | 6.00<br>(4.75, 7.20)          | 6.00<br>(5.00, 7.40)         | <b>&lt;0.001</b> |
| <b>Neutrophils, x10<sup>3</sup>/μL</b>      | 3.40<br>(2.60, 4.20)          | 3.20<br>(2.50, 4.00)           | 3.40<br>(2.70, 4.25)         | 3.40<br>(2.70, 4.20)          | 3.60<br>(2.80, 4.75)         | <b>0.001</b>     |
| <b>Monocytes, x10<sup>3</sup>/μL</b>        | 0.40<br>(0.30, 0.50)          | 0.40<br>(0.30, 0.50)           | 0.40<br>(0.30, 0.50)         | 0.41<br>(0.35, 0.60)          | 0.45<br>(0.38, 0.60)         | <b>&lt;0.001</b> |
| <b>Lymphocytes, x10<sup>3</sup>/μL</b>      | 1.70<br>(1.40, 2.10)          | 1.70<br>(1.35, 2.10)           | 1.70<br>(1.30, 1.15)         | 1.70<br>(1.40, 2.20)          | 1.80<br>(1.50, 2.60)         | 0.163            |
| <b>Eosinophils, x10<sup>3</sup>/μL</b>      | 0.10<br>(0.10, 0.20)          | 0.10<br>(0.10, 0.20)           | 0.10<br>(0.10, 0.20)         | 0.10<br>(0.10, 0.20)          | 0.20<br>(0.10, 0.25)         | <b>0.018</b>     |
| <b>Cystatin C, mg/L</b>                     | 0.88<br>(0.78, 1.05)          | 0.84<br>(0.74,1.00)            | 0.90<br>(0.80, 1.05)         | 0.91<br>(0.80, 1.05)          | 0.90<br>(0.80, 1.02)         | <b>&lt;0.001</b> |

Data are show as median and IQR (25<sup>th</sup>, 75<sup>th</sup>). P-value: Kruskal-Wallis a non-parametric test. OSA= obstructive sleep apnea; AHI= apnea-hypopnea index; AHI <5= no OSA; AHI 5-14= mild OSA; AHI 15-29= moderate OSA; AHI ≥30= severe OSA; WBC= White blood cells.

**Table E3. Variation of Adjusted Associations between Cardiovascular Risk Factors by Race for Apnea Hypopnea Index (ln transformed) (excluding Chinese; n=13)**

|                                                     | White<br>(n=507) |                              | African American<br>(n=382) |                              | Hispanic<br>(n=434) |                              | <i>P</i> for<br>interaction |
|-----------------------------------------------------|------------------|------------------------------|-----------------------------|------------------------------|---------------------|------------------------------|-----------------------------|
|                                                     | Beta             | 95%<br>CI<br>lower,<br>upper | Beta                        | 95%<br>CI<br>lower,<br>upper | Beta                | 95%<br>CI<br>lower,<br>upper |                             |
| <b>WBC total<br/>counts,<br/>x10<sup>3</sup>/μL</b> | 0.020            | -0.017,<br>0.055             | 0.085                       | 0.022,<br>0.150              | 0.004               | -0.023,<br>0.032             | <b>0.04</b>                 |
| <b>Monocyte<br/>counts,<br/>x10<sup>3</sup>/μL</b>  | 0.230            | -0.260,<br>0.723             | 1.033                       | 0.360,<br>1.705              | 0.030               | -0.245,<br>0.302             | <b>0.02</b>                 |

Each row represents a unique regression model adjusted for: age, sex, smoking, BMI, waist circumference, statin use, anti-hypertensive medication, and anti-diabetes use in stratified analysis. The *P* interaction terms included an interaction term for race/ethnicity category and exposure. The *P*-value is for interaction testing any significant difference across 3 groups (by Wald Chi-square test). Similar results were shown with Likelihood ratio Chi-square statistics. White is the reference group. The interaction was tested among three race groups. Missing data were excluded for analysis (final sample with all complete n=1323).

**Table E4: Descriptive Analysis Showing the CV Risk Factors According to the 3-Race-Groups**

|                                                 | <b>White<br/>(n=507)</b> | <b>African<br/>American<br/>(n=382)</b> | <b>Hispanic<br/>(n=434)</b> | <i>P-value</i>   |
|-------------------------------------------------|--------------------------|-----------------------------------------|-----------------------------|------------------|
| <b>Age (y)</b>                                  | 68 ±9                    | 69 ±9                                   | 68 ±9                       | 0.725            |
| <b>Age groups,<br/>(%)</b>                      |                          |                                         |                             | 0.870            |
| < 65y                                           | 40                       | 38                                      | 39                          |                  |
| ≥ 65y                                           | 60                       | 62                                      | 61                          |                  |
| <b>Male, (%)</b>                                | 48                       | 45                                      | 47                          | 0.807            |
| <b>BMI, kg/m<sup>2</sup></b>                    | 28 ±5                    | 31 ±6                                   | 30 ±5                       | <b>&lt;0.001</b> |
| <b>Waist circumf,<br/>cm</b>                    | 99 ±15                   | 103 ±14                                 | 102 ±13                     | <b>&lt;0.001</b> |
| <b>Education level,<br/>(%)</b>                 |                          |                                         |                             | <b>&lt;0.001</b> |
| < High school                                   | 5                        | 7                                       | 39                          |                  |
| High school                                     | 15                       | 17                                      | 22                          |                  |
| College or<br>technical                         | 53                       | 63                                      | 33                          |                  |
| Graduate school                                 | 27                       | 13                                      | 6                           |                  |
| <b>Smoking, (%)</b>                             |                          |                                         |                             | <b>0.001</b>     |
| Never                                           | 38                       | 43                                      | 45                          |                  |
| Former                                          | 56                       | 46                                      | 49                          |                  |
| Current                                         | 6                        | 11                                      | 6                           |                  |
| <b>Statin use, (%)</b>                          | 39                       | 35                                      | 38                          | 0.368            |
| <b>Any<br/>hypertension<br/>medication, (%)</b> | 47                       | 69                                      | 53                          | <b>&lt;0.001</b> |
| <b>Oral<br/>hypoglycemic<br/>use, (%)</b>       | 9                        | 22                                      | 20                          | <b>&lt;0.001</b> |
| <b>Alcohol use<br/>(any), (%)</b>               | 60                       | 42                                      | 33                          | <b>&lt;0.001</b> |
| <b>eGFR,</b>                                    | 77 ±19                   | 85 ±23                                  | 84 ±21                      | <b>&lt;0.001</b> |

| (ml/min/1.73m <sup>2</sup> )                            |                          |                                         |                             |                  |
|---------------------------------------------------------|--------------------------|-----------------------------------------|-----------------------------|------------------|
|                                                         | <b>White<br/>(n=507)</b> | <b>African<br/>American<br/>(n=382)</b> | <b>Hispanic<br/>(n=434)</b> | <b>P-value</b>   |
| <b>Diabetes Mellitus (%)</b>                            | 12                       | 29                                      | 27                          | <b>&lt;0.001</b> |
| <b>Fasting glucose (mg/dL)</b>                          | 98 ±25                   | 104 ±36                                 | 108 ±33                     | <b>&lt;0.001</b> |
| <b>Hypertension (%)</b>                                 | 50                       | 75                                      | 56                          | <b>&lt;0.001</b> |
| <b>Systolic BP (mmHg)</b>                               | 121 ±20                  | 127 ±21                                 | 123 ±21                     | <b>&lt;0.001</b> |
| <b>Diastolic BP (mmHg)</b>                              | 67 ±10                   | 70 ±10                                  | 68 ±10                      | <b>&lt;0.001</b> |
| <b>Total Cholesterol (mg/dL)</b>                        | 183 ±38                  | 181 ±35                                 | 183 ±37                     | 0.806            |
| <b>HDL-cholesterol (mg/dL)</b>                          | 56 ±16                   | 58 ±18                                  | 52 ±14                      | <b>&lt;0.001</b> |
| <b>LDL-cholesterol (mg/dL)</b>                          | 105 ±33                  | 105 ±31                                 | 106 ±31                     | 0.972            |
| <b>Triglycerides (mg/dL)</b>                            | 108 ±60                  | 91 ±45                                  | 130 ±75                     | <b>&lt;0.001</b> |
| <b>Non-HDL cholesterol (mg/dL)</b>                      | 127 ±36                  | 123 ±33                                 | 131 ±36                     | <b>0.005</b>     |
| <b>Asthma (self-report), (%)</b>                        | 2                        | 4                                       | 5                           | <b>0.043</b>     |
| <b>Seasonal allergy past 2-weeks (self-report), (%)</b> | 23                       | 23                                      | 18                          | 0.102            |
|                                                         | <b>White<br/>(n=507)</b> | <b>African<br/>American<br/>(n=382)</b> | <b>Hispanic<br/>(n=434)</b> | <b>P-value</b>   |
| <b>WBC total counts,</b>                                | 5.9<br>(5.0, 7.0)        | 5.3<br>(4.4, 6.6)                       | 6.0<br>(5.0, 7.0)           | <b>&lt;0.001</b> |

|                                                               |                          |                                         |                             |                  |
|---------------------------------------------------------------|--------------------------|-----------------------------------------|-----------------------------|------------------|
| <b>x10<sup>3</sup>/μL</b>                                     |                          |                                         |                             |                  |
| <b>Neutrophils,<br/>x10<sup>3</sup>/μL</b>                    | 3.6<br>(2.8, 4.4)        | 2.9<br>(2.0, 3.9)                       | 3.5<br>(2.8, 4.3)           | <b>&lt;0.001</b> |
| <b>Monocytes,<br/>x10<sup>3</sup>/μL</b>                      | 0.4<br>(0.4, 0.6)        | 0.4<br>(0.3, 0.5)                       | 0.4<br>(0.3, 0.5)           | <b>&lt;0.001</b> |
| <b>Lymphocytes,<br/>x10<sup>3</sup>/μL</b>                    | 1.6<br>(1.3, 2.0)        | 1.8<br>(1.5, 2.3)                       | 1.8<br>(1.4, 2.2)           | <b>&lt;0.001</b> |
| <b>Eosinophils,<br/>x10<sup>3</sup>/μL</b>                    | 0.1<br>(0.1, 0.2)        | 0.1<br>(0.1, 0.2)                       | 0.1<br>(0.1, 0.2)           | <b>0.044</b>     |
| <b>Cystatin C,<br/>mg/L</b>                                   | 0.9<br>(0.8, 1.0)        | 0.9<br>(0.7, 1.0)                       | 0.9<br>(0.7, 1.0)           | 0.426            |
|                                                               | <b>White<br/>(n=507)</b> | <b>African<br/>American<br/>(n=382)</b> | <b>Hispanic<br/>(n=434)</b> | <b>P-value</b>   |
| <b>Total sleep<br/>time, (min)</b>                            | 370 ±73                  | 350 ±88                                 | 355 ±81                     | <b>0.001</b>     |
| <b>Time in Slow-<br/>wave sleep,<br/>(min)</b>                | 41 ±35                   | 30 ±32                                  | 34 ±35                      | <b>&lt;0.001</b> |
| <b>Time in REM<br/>sleep, (min)</b>                           | 70 ±30                   | 65 ±29                                  | 66 ±28                      | <b>0.012</b>     |
| <b>WASO, (min)</b>                                            | 84 ±54                   | 99 ±69                                  | 93 ±67                      | <b>0.015</b>     |
| <b>Time SpO<sub>2</sub><br/>&lt;92%, (%)</b>                  | 14                       | 10                                      | 10                          | <b>0.040</b>     |
| <b>Time<br/>SpO<sub>2</sub>&lt;90%,<br/>(%)</b>               | 5                        | 4                                       | 4                           | 0.264            |
| <b>Time SpO<sub>2</sub>&lt;<br/>85%, (%)</b>                  | 0.8                      | 0.9                                     | 1.1                         | 0.590            |
| <b>Min SpO<sub>2</sub> (%)<br/>in REM sleep,<br/>mean</b>     | 85 ±7                    | 84 ±8                                   | 82 ±10                      | <b>&lt;0.001</b> |
| <b>Min SpO<sub>2</sub> (%)<br/>in NREM sleep,<br/>mean(%)</b> | 86 ±6                    | 86 ±6                                   | 85 ±7                       | <b>0.030</b>     |
| <b>AHI, events/h</b>                                          | 13 ±15                   | 14 ±17                                  | 16 ±17                      | <b>&lt;0.001</b> |

|                                             |        |        |        |                  |
|---------------------------------------------|--------|--------|--------|------------------|
| <b>AHI categories, (%)</b>                  |        |        |        |                  |
| 0-4                                         | 38     | 38     | 30     | <b>0.002</b>     |
| 5-14                                        | 36     | 30     | 33     |                  |
| 15-29                                       | 14     | 18     | 19     |                  |
| ≥30                                         | 12     | 14     | 18     |                  |
| <b>Arousal index, events/h</b>              | 22 ±12 | 20 ±11 | 23 ±12 | <b>&lt;0.001</b> |
| <b>Epworth Sleepiness Scale score, mean</b> | 6 ±4   | 7 ±4   | 6 ±4   | <b>&lt;0.001</b> |
| <b>Epworth Sleepiness Score &gt;10, (%)</b> | 12     | 19     | 13     | <b>0.007</b>     |

Data are shown in mean ±SD for continuous and percentage for categorical variables. For non-normal distributed variables, data are shown as median and (25th, 75th). P-value by ANOVA for continuous variables and normal distributed. P-value by chi-square for categorical variables. P-value by Kruskal-Wallis (a non-parametric test) by continuous variables and non-normal distributed. CV= cardiovascular; OSA= obstructive sleep apnea; AHI= apnea-hypopnea index; AHI <5= no OSA; AHI 5-14= mild OSA; AHI 15-29= moderate OSA; AHI ≥30= severe OSA; BMI= body mass index; eGFR= estimated glomerular filtration rate (measurement of kidney function); BP= blood pressure; HDL= high-density lipoprotein; LDL= low-density lipoprotein. Non-HDL cholesterol is calculated by subtracting the HDL cholesterol value from a total cholesterol reading; WBC= white blood cells; REM= rapid eye movement sleep stage; NREM= non-REM sleep stage; WASO= wake after sleep onset; SpO2= oxygen saturation; Min= minimum; Chinese race-group was excluded (n=13 subjects). Data analysis is all complete. Missing values were excluded.



**Table E5. Main Analysis Associating CV Risk Factors and AHI, Excluding those Using Oral Steroids use (n=17). Outcome: AHI log transformed**

|                                       | <b>Beta</b> | <b>se</b> | <b>P-value</b> |
|---------------------------------------|-------------|-----------|----------------|
| <b>Diastolic BP, mmHg</b>             | 0.007       | 0.003     | <b>0.009</b>   |
| <b>HDL-cholesterol, mg/dL</b>         | -0.004      | 0.0018    | <b>0.025</b>   |
| <b>Neutrophils, x10<sup>3</sup>µL</b> | 0.048       | 0.018     | <b>0.007</b>   |
| <b>WBC total, x10<sup>3</sup>µL</b>   | 0.016       | 0.010     | 0.115          |
| <b>Monocytes, x10<sup>3</sup>µL</b>   | 0.224       | 0.112     | <b>0.047</b>   |
| <b>Lymphocytes, x10<sup>3</sup>µL</b> | -0.006      | 0.017     | 0.736          |
| <b>Eosinophils, x10<sup>3</sup>µL</b> | 0.060       | 0.200     | 0.770          |
| <b>Cystatin C, mg/L</b>               | -0.021      | 0.093     | 0.820          |

CV= cardiovascular; AHI= apnea hypopnea index; outcome variable was natural log transformed after added unit; se= standard error; BP= blood pressure; HDL= high-density lipoprotein; WBC= white blood cells; Adjustments for age, sex, race/ethnicity, smoking status, statin use, any anti-hypertension medication, anti-diabetes medication (insulin use and/or oral hypoglycemic use), BMI, and waist circumference. All complete for analysis (n=1,316). Missing data were excluded
